# Supplementary material for: Bottom-up design of carbon allotropes with tunable properties
Source: Royal Society of Chemistry journal article supplement (doi:10.1039/d3cp04940j), 2024-01-01
Supplement: d3cp04940j1.pdf [file d3cp04940j1.pdf]

## SUPPLEMENTARY MATERIAL

### Bottom-up design of carbon allotropes with tunable properties

Pan Ying<sup>1</sup>, Yufei Gao<sup>2\*</sup>, Zihe Li<sup>3</sup>, Mengdong Ma<sup>4</sup>, Chao Liu<sup>5\*</sup>, Guodong Tang<sup>1\*</sup>

<sup>1</sup>National Key Laboratory of Advanced Casting Technologies, MIIT Key Laboratory of Advanced Metallic and Intermetallic Materials Technology, Engineering Research Center of Materials Behavior and Design, Ministry of Education Nanjing University of Science and Technology, Nanjing, 210094, China

<sup>2</sup>Center for High Pressure Science (CHiPS), State Key Laboratory of Metastable Materials Science and Technology, Yanshan University, Qinhuangdao 066004, China

<sup>3</sup>Center for Advanced Mechanics and Materials, Applied Mechanics Laboratory, Department of Engineering Mechanics, Tsinghua University, Beijing 100084, China

<sup>4</sup>Macao Institute of Materials Science and Engineering, Macau University of Science and Technology, Macao 999078, China

<sup>5</sup>Faculty of Materials Metallurgy and Chemistry, Jiangxi University of Science and Technology, Ganzhou 341000, China

\* Author to whom correspondence should be addressed. E-mail address: [gyf@ysu.edu.cn](mailto:gyf@ysu.edu.cn); [liuchao198967@126.com](mailto:liuchao198967@126.com); [tanguodong@njust.edu.cn](mailto:tanguodong@njust.edu.cn)

**Table S1.** The detail atomic wyckoff positions of Pco-C<sub>24</sub>, Pco-C<sub>24</sub>', Pco-C<sub>12</sub> and Pco-C<sub>6</sub>.

|                       | Method | Atomic wyckoff positions         |
|-----------------------|--------|----------------------------------|
| Pco-C <sub>24</sub>   | LDA    | C1 (0.18521, 0.50000, 0.40682)   |
|                       |        | C2 (0.50000, 0.50000, 0.19680)   |
| Pco-C <sub>24</sub> ' | LDA    | C1 (0.14583, 0.16935, -0.69879)  |
|                       |        | C2 (0.00000, 0.41605, 0.00000)   |
| Pco-C <sub>12</sub>   | LDA    | C1 (0.43218, 0.34449, -0.97228)  |
|                       |        | C2 (0.56805, 0.84841, -0.63951)  |
|                       |        | C3 (0.56552, 0.33803, -0.34914)  |
| Pco-C <sub>6</sub>    | LDA    | C1 (-0.75000, -0.00000, 0.11507) |
|                       |        | C2 (-0.25000, 0.29504, 0.61729)  |

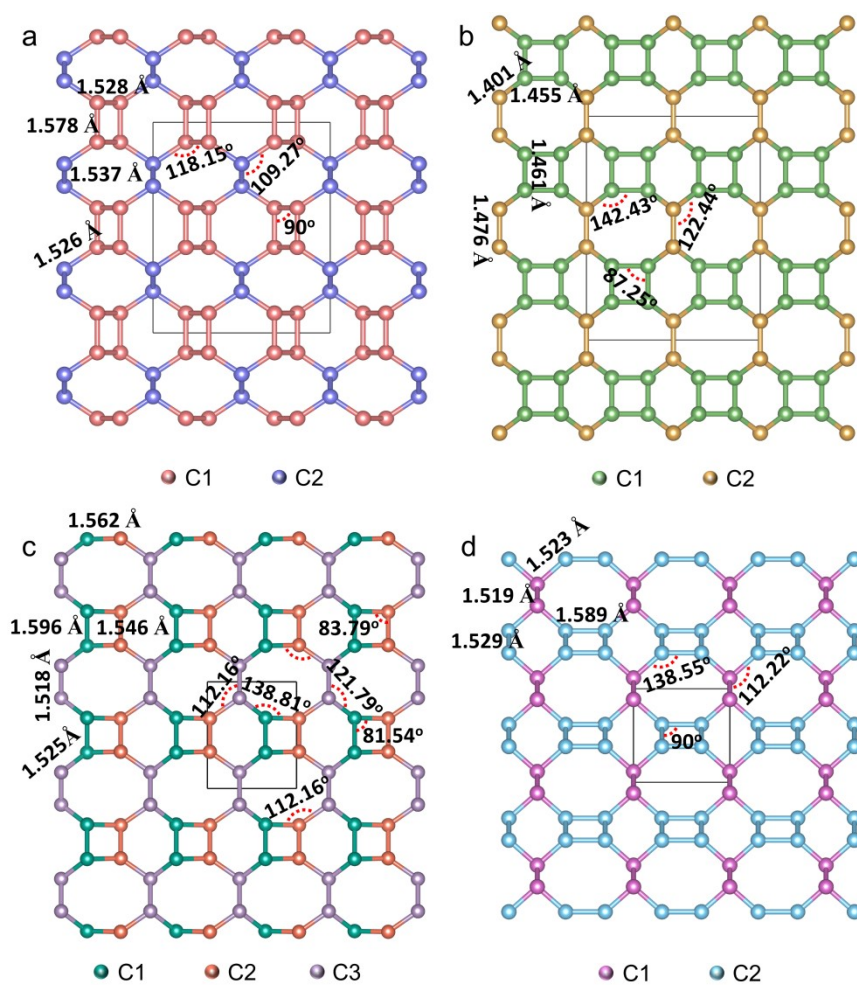

**Figure S1.** The bond lengths of the neighboring carbon atoms and bond angles of Pco-C<sub>24</sub> (a), Pco-C<sub>24</sub>' (b), Pco-C<sub>12</sub> (c) and Pco-C<sub>6</sub> (d).

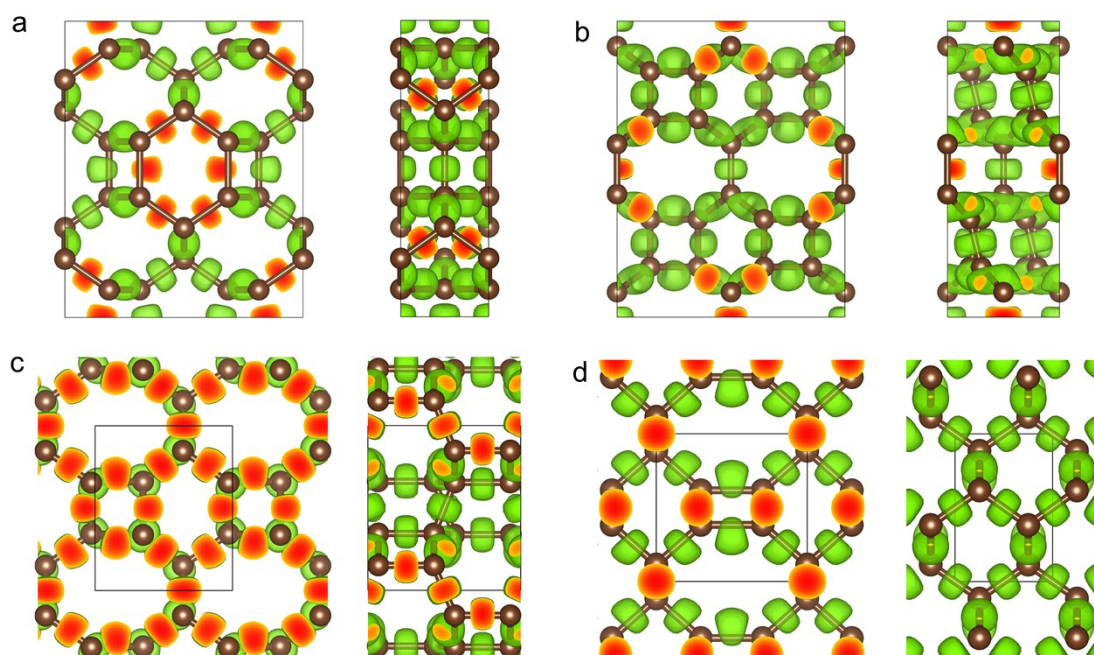

**Figure S2.** Electron localization function (ELF) of Pco-C<sub>24</sub> (a), Pco-C<sub>24</sub>' (b), Pco-C<sub>12</sub> (c) and Pco-C<sub>6</sub> (d) with an isosurface level set to 0.75.

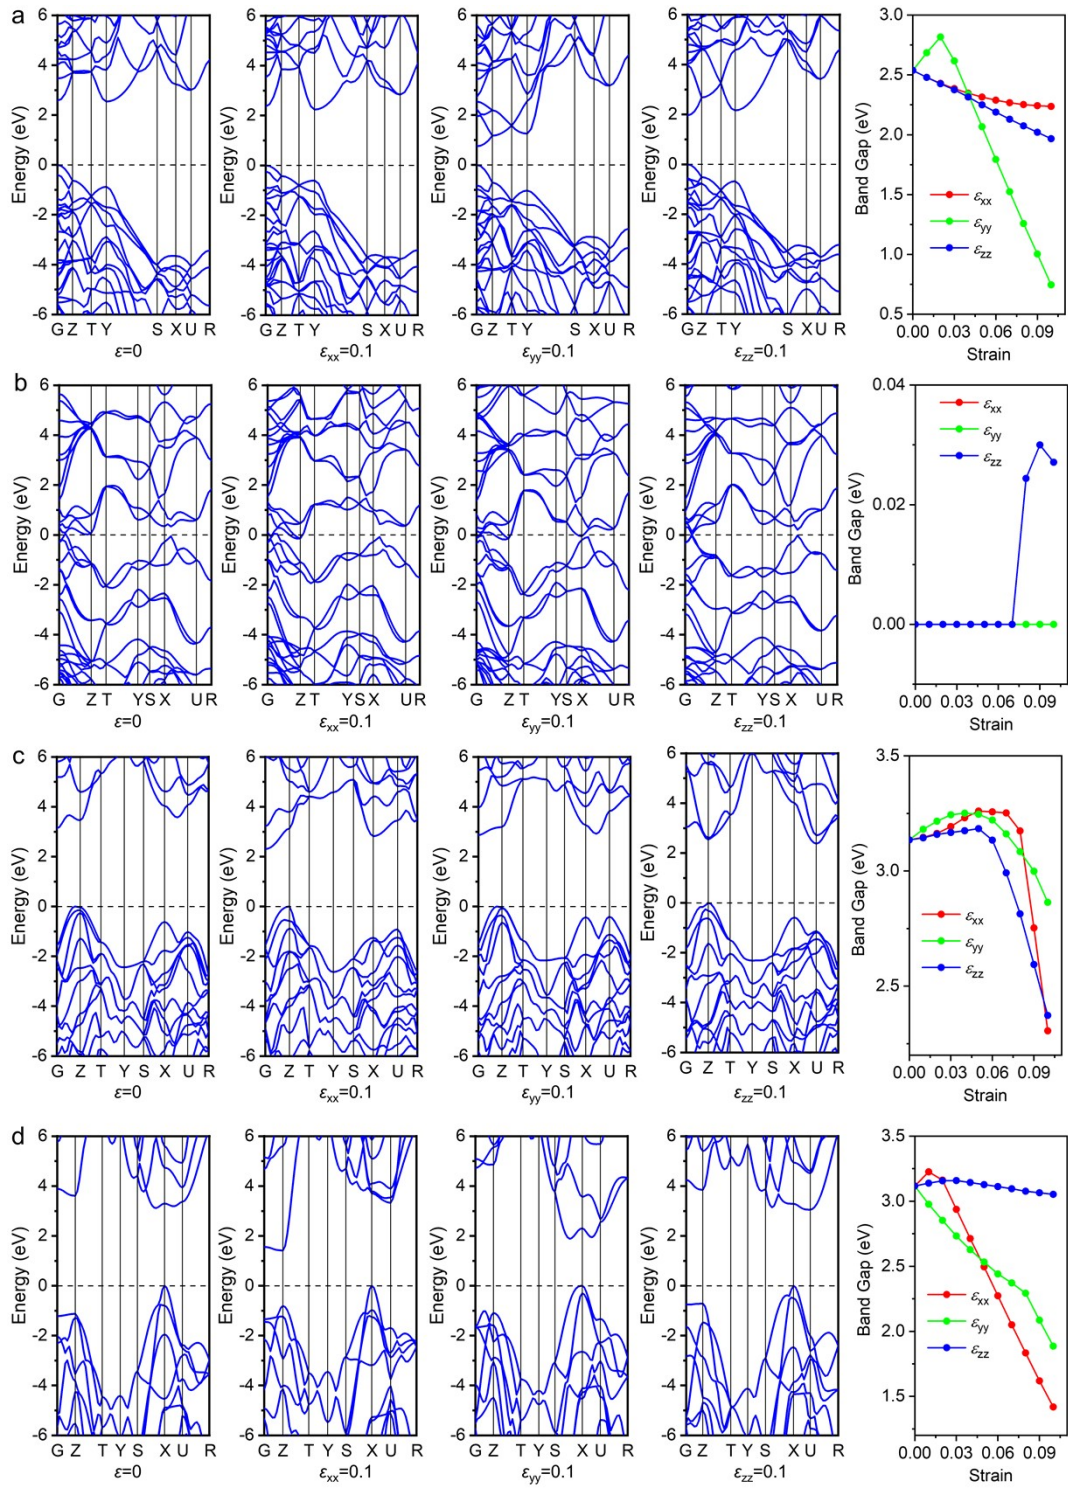

**Figure S3.** The band structures with uniaxial strain of 0% and 10% applied along the  $x$ ,  $y$  and  $z$  directions and the band gap curves with strain. (a) Pco-C<sub>24</sub>; (b) Pco-C<sub>24</sub>'; (c) Pco-C<sub>12</sub>; (d) Pco-C<sub>6</sub>.
